# Supplementary material
Source: Springer Nature journal article supplement (https://www.springermedizin.de/resource/supplementary/12913_2013_3010_MOESM2_ESM.pdf/9533274)

# Trastuzumab

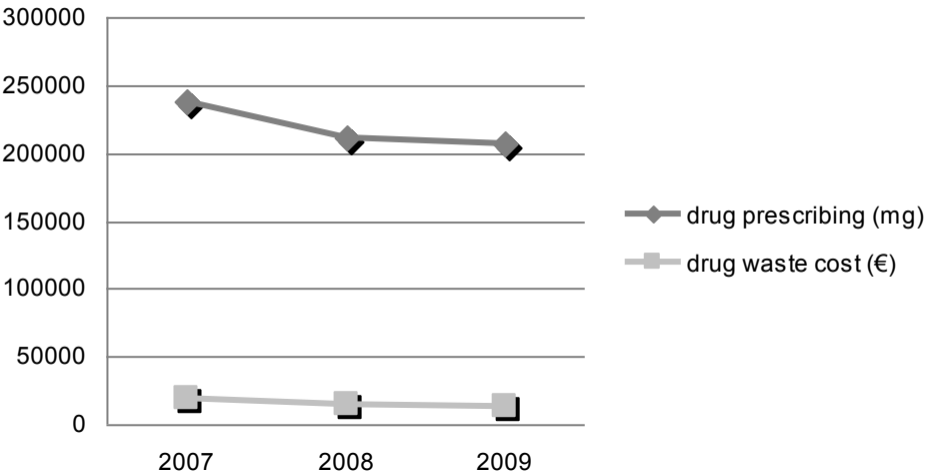

Supplement: MOESM2 [file 9533274]
